---

## Comprehensive Study on G protein $\alpha$ -Subunits in Taste Bud Cells, with Special Reference to the Occurrence of $G\alpha i2$ as a Major $G\alpha$ Species

---

Yuko Kusakabe<sup>1</sup>, Akihito Yasuoka<sup>2</sup>, Misaki Asano-Miyoshi<sup>2,3</sup>, Kyoko Iwabuchi, Ichiro Matsumoto, Soichi Arai<sup>4</sup>, Yasufumi Emori<sup>3</sup> and Keiko Abe

Department of Applied Biological Chemistry, Graduate School of Agricultural and Life Sciences, University of Tokyo, 1-1-1 Yayoi, Bunkyo-ku, Tokyo 113-8657, <sup>2</sup>Bio-oriented Technology Research Advancement Institution, <sup>3</sup>Department of Biophysics and Biochemistry, Faculty of Science, The University of Tokyo, 7-3-1 Hongo, Bunkyo-ku, Tokyo 113-0033 and <sup>4</sup>Department of Nutritional Science, Faculty of Applied Biological Science, Tokyo University of Agriculture, 1-1-1 Sakuragaoka, Setagaya-ku, Tokyo 156-8502, Japan

<sup>1</sup>Present address: National Food Research Institute, 2-1-2 Kannondai, Tsukuba-shi, Ibaraki 305-8642, Japan

Correspondence to be sent to: Keiko Abe, Department of Applied Biological Chemistry, Graduate School of Agricultural and Life Sciences, University of Tokyo, 1-1-1 Yayoi, Bunkyo-ku, Tokyo 113-8657, Japan. e-mail aka7308@mail.ecc.u-tokyo.ac.jp

---

### Abstract

Previous studies have identified many cDNA species that encode a variety of G protein  $\alpha$ -subunits occurring in taste buds. These include the cDNA encoding a taste-bud-specific  $G\alpha$ , gustducin ( $G_{gust}$ ). Here we carried out comprehensive analyses of  $G\alpha$  species that occur in the taste buds of rat circumvallate papillae and also in their single cells isolated from the taste buds. Reverse transcriptase–polymerase chain reaction showed the presence of 10 kinds of  $G\alpha$  cDNAs, including a splice variant of  $G\alpha s$ , among which  $G_{gust}$ ,  $G\alpha s$ ,  $G\alpha i2$  and  $G\alpha i3$  cDNAs were shown to be major species. *In situ* hybridization and immunohistochemistry showed that  $G\alpha i2$ , as well as  $G_{gust}$ , expressed in a subset of taste bud cells, and the frequency of  $G\alpha i2$ -expression appears to be higher than that of  $G_{gust}$ . Southern analyses of the amplified cDNA from single cells showed that each taste bud cell expresses multiple  $G\alpha$  mRNA species. For example, some  $G\alpha i2$ -positive cells also express one or more other  $G\alpha$  species, including  $G\alpha s$ ,  $G\alpha i3$  and  $G_{gust}$ , and there is no apparent correlation in expression among the three  $G\alpha$  species.

### Introduction

In vertebrates, taste chemoreception takes place in taste bud cells (Lindemann, 1996). These comprise at least three types of elongated, spindle-shaped cells and a type of globular basal cell, all of which are derived from epithelial cells (Stone *et al.*, 1995). These cell types are thought to differ physiologically as well as morphologically (Delay *et al.*, 1986; Lindeman, 1996).

Sweet and bitter taste senses in humans and other mammals are believed to be mediated by a G-protein-coupled signaling system (Akabas *et al.*, 1988; Avenet *et al.*, 1988; Striem *et al.*, 1989; Brand *et al.*, 1991; Spielman *et al.*, 1994) that involves G-protein-coupled receptors (GPCRs), coupling G proteins, related effectors and other intracellular signaling factors. Various molecules have been identified and proposed as constituents involved in the system. Many rhodopsin-type GPCRs (Abe *et al.*, 1993a,b; Matsuoka *et al.*, 1993; Tal *et al.*, 1995; Thomas *et al.*, 1996) and taste-

specific  $Ca^{2+}$ -sensing receptors (TR1 and TR2) (Hoon *et al.*, 1999) have been isolated from tongue epithelia. Meanwhile,  $G_{gust}$ , a  $G\alpha i$ -type G protein  $\alpha$ -subunit closely related to transducin ( $G\alpha t$ ), has been recognized as an essential component involved in sweet and bitter taste transduction (McLaughlin *et al.*, 1992; Wong *et al.*, 1996). Also, there are reportedly other  $G\alpha$  species in taste tissues (McLaughlin *et al.*, 1992, 1994; Kusakabe *et al.*, 1998), although their physiological significance has yet to be elucidated. The possibility exists that these  $G\alpha$  species may function in parallel with  $G_{gust}$ -mediated taste signaling. Relevant to this, it has been postulated that  $G\alpha q$  and  $G\alpha 15$  mediate  $Ca^{2+}$  signaling (Kusakabe *et al.*, 1998) in parallel with a  $G_{gust}$ -mediated cAMP pathway (McLaughlin *et al.*, 1994). It is also possible that  $G\alpha$  species may be involved in other signaling pathways, such as a cell-to-cell communication between taste bud cells. However, the total understanding of

such receptor-mediated signalings in taste bud cells requires comprehensive studies to describe the G proteins in taste bud cells to be performed.

In this study, we adopted four methods to analyze the expression of G $\alpha$  species in taste buds and their constituent cells: reverse transcriptase–polymerase chain reaction (RT–PCR), *in situ* hybridization, immunohistochemistry and Southern analyses using amplified cDNA from single taste bud cells. By these procedures we have newly identified two G $\alpha$  subunits, G $\alpha$ i2 and G $\alpha$ i3, as relatively abundant G $\alpha$  subunits, in addition to the G $\alpha$ s and G $\alpha$ <sub>gust</sub> already reported (McLaughlin *et al.*, 1994). We also show that G $\alpha$ i2-expression occurs in a subset of taste bud cells, suggesting the presence of a G $\alpha$ i2-mediated signaling pathway in the taste bud.

## Materials and methods

### Isolation of taste buds and single cells from taste buds

Five-week-old male rats (Wistar) were killed by injection of sodium pentobarbital. Tongues were dissected immediately and put into Ringer solution (150 mM NaCl, 4.7 mM KCl, 3.3 mM CaCl<sub>2</sub>, 0.1 mM MgCl<sub>2</sub>, 2 mM HEPES and 7.8 mM glucose). Ringer solution containing Type I collagenase (2 mg/ml, Sigma-aldrich) (collagenase solution) was injected beneath a circumvallate papilla. After incubation for 30 min at room temperature, epithelia containing the circumvallate papillae were peeled off. Epithelial sheets were again soaked in collagenase solution for 10 min at room temperature, transferred to Ca<sup>2+</sup>-free Ringer solution containing 2 mM EDTA and incubated for 10 min. Taste buds were isolated in Ringer solution containing 0.1% bovine serum albumin (fraction V, Sigma-aldrich) (BSA solution) by suction through a 50- $\mu$ m-diameter pipette and transferred into a new plate containing BSA solution. The isolated taste buds were dispersed by pipetting and individual spindle-shaped cells were collected for single cell analyses.

### Identification of G $\alpha$ members expressed in taste buds

mRNA was purified from 100 taste buds by the usual method (Sambrook *et al.*, 1989). RT–PCR was carried out using the following primers: 5'-GGIAA(AG)(AT)(GC)-IACITT(TC)(CA)TIAA(AG)CA(AG)ATG-3' (primer A), and 5'-GGIAA(AG)AG(TC)ACIATIGTIAA(GA)CA(G-A)ATG-3' (primer B) for sense, and 5'-(TC)(TC)ITGICCI-CCIAC(GA)TC(GA)AA(GC)AT-3' (primer C) and 5'-TCI-(TG)(CA)IC(TG)(CT)TGICCIACIAC(GA)TC-3' (primer D) for antisense. These primers were made based on the amino acid sequences GKSTFLKQM, GKSTIVKQM, M/IFDVGQ/HR/E and DVGGQRS/DE, which were found as consensus sequences common to most of the known G $\alpha$  members. PCR was carried out for 30 cycles under the following conditions: 94°C for 1 min, 52°C for

1 min and 72°C for 2 min. The resulting 480 bp fragments were gel-isolated, cloned into pBluescrip SK (Stratagene) and sequenced.

### RT-PCR of the mRNA obtained from single taste bud cells, and Southern blot analysis of G $\alpha$ cDNAs

The cDNA from each of the single cells was synthesized and amplified by the method of Dulac and Axel (Dulac and Axel, 1995). Aliquots of cDNA samples prepared from single cells were electrophoresed in a 1% agarose gel and blotted onto nylon membranes (Hybond-N, Amersham, UK). The membranes were processed for hybridization using <sup>32</sup>P-labeled DNA probes corresponding to the 3'-noncoding regions of G $\alpha$ s, G $\alpha$ i2, G $\alpha$ i3, G $\alpha$ <sub>gust</sub> and  $\beta$ -actin mRNAs. The 3'-noncoding regions of G $\alpha$ s, G $\alpha$ i2, G $\alpha$ i3 and G $\alpha$ <sub>gust</sub> were obtained by RT–PCR using the taste bud mRNA as a template and the specific primers, 5'-CACCTGAAT-TCTATGAGCAT-3' (+429–+448) and 5'-TTAAGCTT-ACTAAATTTGGA-3' (+1375–+1356) for G $\alpha$ s (Jones *et al.*, 1987); 5'-ATAAGCTTCGGGGCAGTGGGCCTG-GCAGG-3' (+1068–+1087) (added *Hind*III site italicized) and 5'-ATGAATTTCGCCTCCAAGCGGCAGAGAGT-3' (+1517–+1498) (added *Eco*RI site italicized) for G $\alpha$ i2 (Jones *et al.*, 1987); 5'-ATAAGCTTGAGGATGGCA-TAGTAAAAGC-3' (+1066–+1085) (added *Hind*III site italicized) and 5'-TCTCTAGAGTGGAAATATTACTC-CTGACC-3' (+1584–+1565) (added *Xba*I site italicized) for G $\alpha$ i3 (Jones *et al.*, 1987); and 5'-ATGCCGTGACAGAT-ATAATA-3' (+1027–+1047) and 5'-TGCTTGTGGCAG-CCTAATTG-3' (+1510–+1491) for G $\alpha$ <sub>gust</sub> (McLaughlin *et al.*, 1992). The  $\beta$ -actin DNA fragment was obtained by RT–PCR using two primers, 5'-GAACCCTAAGGC-CAACCGTG-3' (+1658–+1677) and 5'-ATGGTGGTG-CCACCAGACAG-3' (+2775–+2794) (Nudel *et al.*, 1983). Hybridization and washing were carried out under the usual stringent conditions at 68°C, with the final wash done in 0.1  $\times$  SSC containing 0.1% sodium dodecyl sulfate at the same temperature.

### *In situ* hybridization

Digoxigenin-labeled anti-sense RNA probes for G $\alpha$ s, G $\alpha$ i2, G $\alpha$ i3 and G $\alpha$ <sub>gust</sub> were synthesized using T3 or T7 RNA polymerase. The circumvallate papillae layer from the tongue of a 5-week-old male rat (Wistar) was removed, frozen in OCT compound, and sectioned into 10  $\mu$ m slices. *In situ* hybridization was performed as described previously (Schaeren-Wiemers and Gerfin-Moser, 1993; Asano-Miyoshi *et al.*, 1998; Yasuoka *et al.*, 1999). The sections were post-fixed for 10 min in 4% paraformaldehyde in 0.1 M phosphate buffer, pH 7.0, washed twice in PBS containing 1% diethylpyrocarbonate for 15 min, washed in 5  $\times$  SSC for 15 min and prehybridized in prehybridization solution containing 50% formamide and 5  $\times$  SSC, 40  $\mu$ g/ml denatured herring sperm DNA for 1 h at room temperature. Next, 0.1 ml of hybridization buffer containing 50%

**Table 1** Number of taste bud  $G\alpha$  cDNA clones isolated by RT-PCR using two different primer sets

| $G\alpha$ species | Primer set |     |
|-------------------|------------|-----|
|                   | A-C        | B-D |
| $G_{gust}$        | 4          | 3   |
| $G_{t-cone}$      | 0          | 1   |
| $G\alpha i1$      | 2          | 0   |
| $G\alpha i2$      | 6          | 3   |
| $G\alpha i3$      | 4          | 5   |
| $G\alpha q$       | 2          | 0   |
| $G\alpha 14$      | 1          | 0   |
| $G\alpha 15$      | 2          | 0   |
| $G\alpha s$       | 6          | 6   |
| $G\alpha s3$      | 3          | 0   |

For RT-PCR, a template was prepared from the taste buds of rat circumvallate papillae. Sense primers (A and B) and antisense primers (C and D) were used. For details see Materials and methods. A-D and B-C gave results similar to those obtained using A-C and B-D, respectively.

formamide,  $5 \times$  SSC,  $5 \times$  Denhardt's solution, 500  $\mu$ g/ml sonicated, denatured herring sperm DNA, 250  $\mu$ g/ml torula tRNA, 1 mM dithiothreitol, and  $\sim 5$ –10 ng of probe were added to the slide. The slide was covered with a siliconized coverslip and hybridized for 36 h at 58°C. The coverslips were removed by soaking in  $5 \times$  SSC at 58°C and the slides were washed twice in  $0.2 \times$  SSC for 30 min at the same temperature. The sections were washed in Tris-buffered saline (TBS) for 5 min, blocked in 0.5% blocking reagent (Boehringer) in TBS for 1 h at room temperature and incubated in the same solution containing a 1:1000 dilution of anti-digoxigenin Fab fragments conjugated with alkaline phosphatase for 1 h. The slides were then washed three times in TBS for 15 min and once in alkaline phosphatase buffer containing 100 mM Tris-HCl, pH 9.5, 100 mM NaCl and 50 mM  $MgCl_2$  for 5 min. The color reaction was performed by adding the color developing solution containing nitroblue tetrazolium and 5-bromo-4-chloro-3-indolyl phosphate in alkaline phosphatase buffer onto the slide.

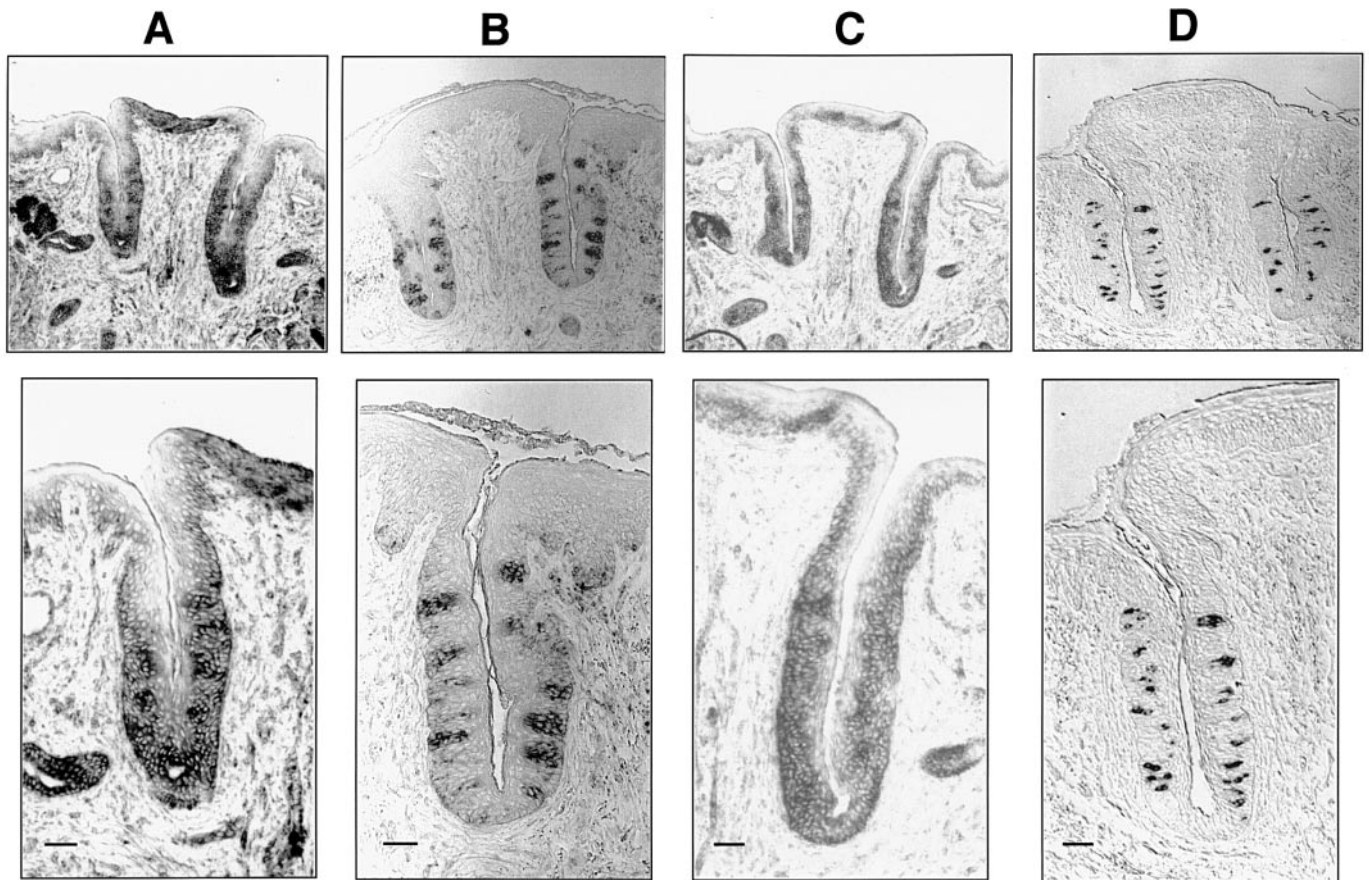

**Figure 1** *In situ* hybridization showing the expression of  $G\alpha s$ ,  $G\alpha i2$ ,  $G\alpha i3$  and  $G_{gust}$  in circumvallate papillae. Coronal sections, 10  $\mu$ m each in thickness, were prepared from the circumvallate papillae of a 5-week-old male rat. Each section was hybridized with digoxigenin-labeled probes for the detection of  $G\alpha s$  (A),  $G\alpha i2$  (B),  $G\alpha i3$  (C) and  $G_{gust}$  (D). Note that  $G\alpha i2$  (B) as well as  $G_{gust}$  (D) are distinctly expressed in a subset of taste bud cells. Bars represent 50  $\mu$ m.



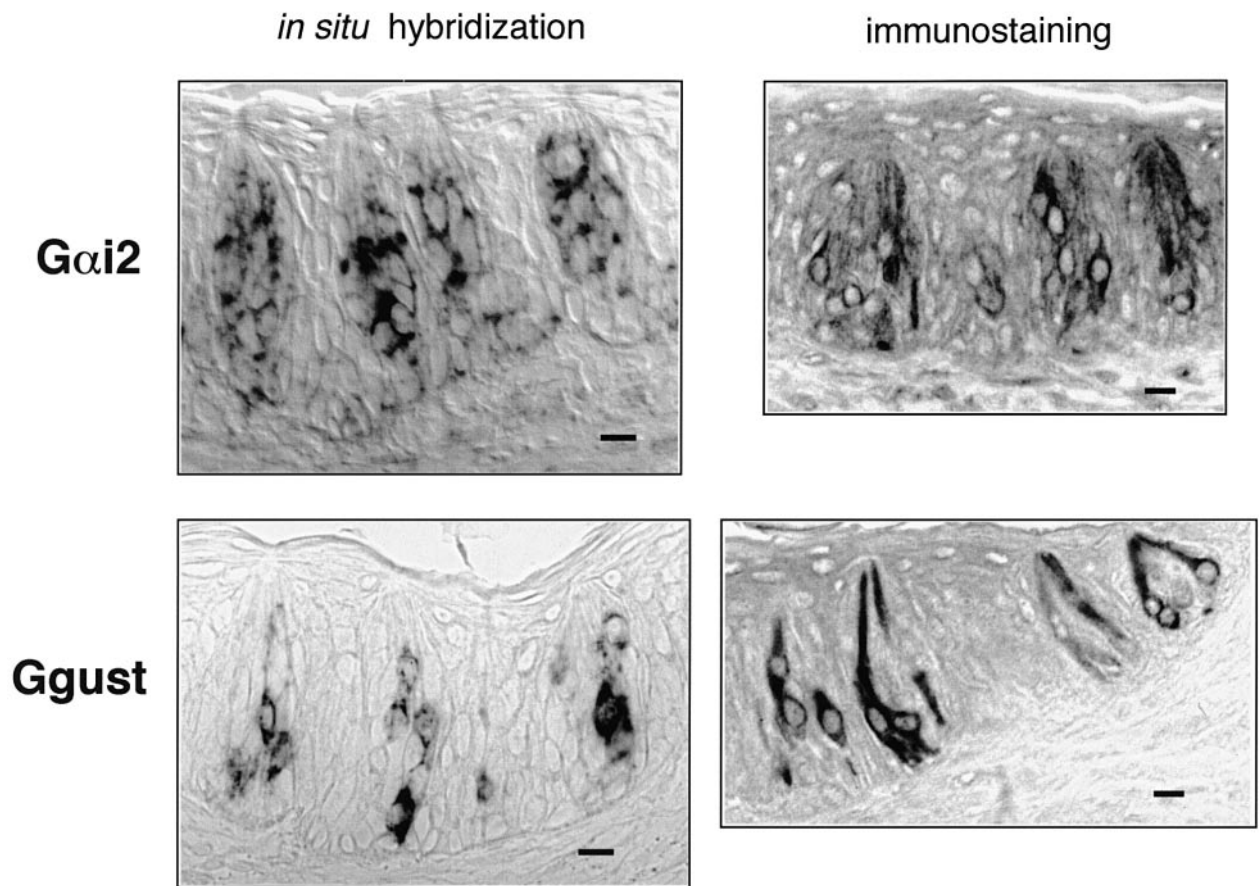

**Figure 2** *In situ* hybridization and immunostaining showing the expression of  $G\alpha i2$  and  $G_{gust}$  in taste buds. Conditions for *in situ* hybridization, methods for preparing coronal sections and details of the hybridization are the same as in Figure 1. For immunostaining, circumvallate papillae were excised from a 5-week-old male rat and fixed in Bouin's solution. Each section, 6  $\mu\text{m}$  in thickness, was immunoreacted with anti- $G\alpha i2$  antibody (1:50) or anti- $G_{gust}$  antibody (1:100). Signals are observed in particular cells that constitute each taste bud. The frequency of the  $G\alpha i2$  signals in taste buds appears to be larger than that of  $G_{gust}$  signals. Bars represent 10  $\mu\text{m}$ .

#### Immunostaining of circumvallate papillae

Anti- $G\alpha i2$  antibody, a gift from Dr T. Asano (Ueda *et al.*, 1998), was further purified by preabsorption with recombinant  $G_{gust}$  protein. Anti- $G_{gust}$  antibody was purchased from Santa Cruz Biotechnology Corp. We produced  $G\alpha i1$ ,  $G\alpha i2$  and  $G\alpha i3$  proteins by expression in *Escherichia coli*. We confirmed by Western blotting that anti- $G\alpha i2$  and anti- $G_{gust}$  antibodies cross-reacted only with  $G\alpha i2$  and  $G_{gust}$ , respectively. Tongues were fixed in Bouin's solution fixative (Sigma), dehydrated, embedded in paraffin and sectioned at 6  $\mu\text{m}$  thickness. Each section was immunoreacted with each of the anti- $G\alpha i2$  antibody and anti- $G_{gust}$  antibody, at dilutions of 1:50 and 1:100 respectively. After rinsing in PBS, the immunoreacted sections were incubated with biotin-labeled anti-rabbit IgG at a dilution of 1:500 and then treated with a complex of avidin-and-biotin-conjugated peroxidase (Vector Laboratories). The signals were developed by treatment with 0.05% 3,3'-diaminobenzidine tetrahydrochloride and 0.01% hydrogen peroxide in 10 mM sodium phosphate, pH 7.4.

#### Results

##### Identification by RT-PCR of multiple $G\alpha$ species expressed in taste buds

We carried out RT-PCR using the cDNAs prepared from isolated taste buds and identified 10 kinds of  $G\alpha$  cDNA clones (Table 1). Among them,  $G_{gust}$ ,  $G\alpha q$  and  $G\alpha 15$  have been reported to exist in taste buds (McLaughlin *et al.*, 1992; Kusakabe *et al.*, 1998). We newly identified an exon 3-splice variant ( $G\alpha s3$ ) that lacks part of the N-terminal region of  $G\alpha s$  (Feinstein *et al.*, 1992). In addition, we identified three  $G\alpha i$  species— $G\alpha i1$ ,  $G\alpha i2$  and  $G\alpha i3$ —and a  $G\alpha q$  species— $G\alpha 14$ —although the frequencies of  $G\alpha i1$  and  $G\alpha 14$  in the cDNA clones were lower. Since the cDNA used was synthesized from isolated taste buds freed from adjacent tissues, these  $G\alpha$  species identified were derived from taste bud mRNA, and the numbers of cDNA clones of each cDNA species may reflect the relative abundance of  $G\alpha s$  species occurring in taste bud cells.

Next, in order to examine the cellular localization of

each  $G\alpha$  species in taste buds, we carried out *in situ* hybridization experiments using the  $G\alpha$  probes obtained above. The results show that the antisense probes for  $G\alpha_s$ ,  $G\alpha_i2$ ,  $G\alpha_i3$  and  $G_{gust}$ , all of which show higher values in Table 1, gave significant signals (Figure 1). On the other hand, the other probes gave faint signals in taste buds, and in some cases showed ubiquitous signals throughout the non-sensory epithelial tissues (data not shown). The  $G\alpha_s$  probe gave distinct signals in taste buds, but there was no specific pattern (Figure 1A). The signals for  $G\alpha_i3$ , although its expression frequency is similar to the others, were generally weak and ubiquitous in the basolateral regions of both taste buds and other parts of the epithelia (Figure 1C).  $G\alpha_i2$  and  $G_{gust}$  showed characteristic expression features (Figure 1B,D). The signals for  $G\alpha_i2$  were observed specifically in taste buds, but not in papillary epithelium lacking taste buds. The profile of  $G_{gust}$  was essentially the same as previously reported (Yang *et al.*, 1999).  $G\alpha_i2$ -positive cells appeared to be larger in number than  $G_{gust}$ -positive cells.

Since our *in situ* hybridization experiment showed that  $G\alpha_i2$  and  $G_{gust}$  show taste-bud-specific expression (Figure 1), we next performed immunostaining with specific antibodies and compared the results with those of *in situ* hybridization experiments. As shown in Figure 2, subpopulations of taste bud cells were stained by both *in situ* hybridization and immunostaining. The results from both experiments are essentially the same.  $G\alpha_i2$ -positive cells were more than  $G_{gust}$ -positive cells, although the signals for  $G_{gust}$  were higher and clearer than those for  $G\alpha_i2$ .  $G\alpha_i2$ - and  $G_{gust}$ -positive cells are estimated to be ~30 and 20%, respectively, in the taste bud cells.

#### Multiple $G\alpha$ species expressed in single taste bud cells

As shown above, at least four  $G\alpha$  species ( $G\alpha_s$ ,  $G\alpha_i2$ ,  $G\alpha_i3$  and  $G_{gust}$ ) are expressed in substantial amounts in taste buds, and their expression profiles appear to differ from one another. To obtain more precise information about  $G\alpha$  expression at the cellular level, we examined how many and which  $G\alpha$  species are expressed in individual cells by Southern blot analysis using amplified cDNA from single taste bud cells according to the method described for olfactory neurons (Dulac and Axel, 1995). We obtained cDNA from individual spindle-shaped taste bud cells and used four  $G\alpha$  probes. However, we noticed that the RNA extraction efficiency and PCR amplification efficiency as estimated from the signal intensity of  $\beta$ -actin varied during the experiment (data not shown). Therefore, we focused on  $G\alpha_i2$ , which was found to be expressed in a subset of taste bud cells. We used  $G\alpha_i2$ -positive cDNA preparations and looked at whether or not the other three  $G\alpha$  species were expressed in the  $G\alpha_i2$ -positive cell. As shown in Figure 3,  $G\alpha_i2$ -positive cells were positive to probes for one to three of the other  $G\alpha$  species, indicating that multiple  $G\alpha$  species are co-expressed in each taste bud cell. It was also shown that there is no apparent correlation among the expression

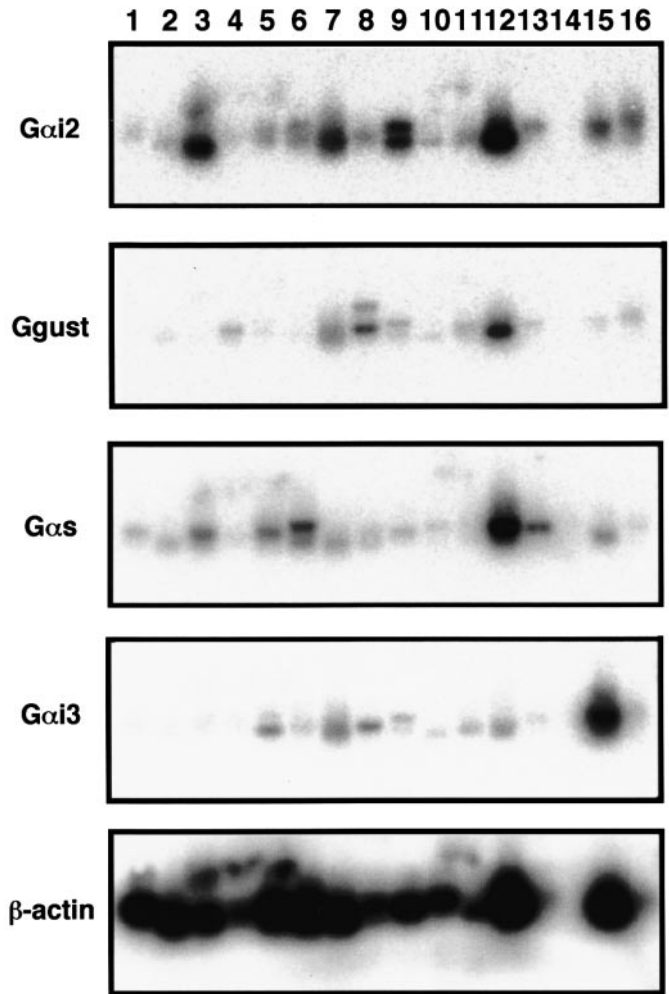

**Figure 3** Southern blot analysis showing the expression of  $G\alpha_s$ ,  $G\alpha_i2$ ,  $G\alpha_i3$  and  $G_{gust}$  in single taste bud cells. Amplified cDNA samples from 16 single taste bud cells positive to the  $G\alpha_i2$  probe were electrophoresed, blotted and hybridized at 68°C with radiolabeled probes for  $G\alpha_s$ ,  $G\alpha_i2$ ,  $G\alpha_i3$ ,  $G_{gust}$  and  $\beta$ -actin. Lane 14 shows the result with amplified cDNA prepared without using reverse transcriptase as a negative control. Some lanes have plural bands with different sizes. This phenomenon is apparently due to the steric hindrance of mRNA molecules.

patterns of  $G\alpha_s$ ,  $G\alpha_i3$  and  $G_{gust}$ : in some cases (nos 7 and 12 in Figure 3) all four  $G\alpha$  species were expressed and in others (nos 1 and 3)  $G_{gust}$  was not expressed. Further, different cells showed different relative abundance with respect to the expression of the four  $G\alpha$  species. An example is offered for two cells, no. 15, which is abundant in  $G\alpha_i3$ , and no. 12, which is abundant in  $G\alpha_i2$  and  $G\alpha_s$ , although these two cells expressed  $\beta$ -actin equally.

#### Discussion

Here we have newly identified several  $G\alpha$  species expressed in taste tissues. This study, together with previous papers (McLaughlin *et al.*, 1992, 1994, Kusakabe *et al.*, 1998), demonstrates that 12  $G\alpha$  species are expressed in taste

tissues. Our study also shows that, among the 12,  $G_{\text{gust}}$ ,  $G_{\alpha 5}$ ,  $G_{\alpha i 2}$  and  $G_{\alpha i 3}$  are the dominant species in taste buds; also, in particular,  $G_{\text{gust}}$  and  $G_{\alpha i 2}$  are expressed in a subset of taste bud cells.  $G_{\alpha i 2}$  is thus expected to play a role in taste signal transduction, as in the case of  $G_{\text{gust}}$ . It is also possible that  $G_{\alpha i 3}$  and/or  $G_{\alpha 5}$ , in addition to  $G_{\alpha i 2}$  and  $G_{\text{gust}}$ , may have physiological functions, such as the tuning of  $G_{\alpha i 2}$  and  $G_{\text{gust}}$  in taste signaling, because some  $G_{\alpha i 2}$ -positive cells express  $G_{\alpha i 3}$  and/or  $G_{\alpha 5}$ , while some  $G_{\text{gust}}$ -positive cells express  $G_{\alpha i 3}$  and/or  $G_{\alpha 5}$ . On the other hand, the other minor  $G_{\alpha}$  species, such as  $G_{\alpha 14}$ ,  $G_{\text{t-cone}}$  and  $G_{\alpha i 1}$ , may also be of some physiological importance, although their expression levels are lower and/or ubiquitous.

In conclusion, it appears that the composition of  $G_{\alpha}$  species in taste bud cells is complicated and that multiple  $G_{\alpha}$  species occur in individual cells. This may be natural in the sense that, within each taste bud cell and between two of them, there are a number of cellular events other than the taste signaling, including cell-to-cell interaction, cell division, cell differentiation and signaling from gustatory nerves (Lindeman, 1996).

One intriguing observation obtained in this study is the cell-type-specific expression of  $G_{\alpha i 2}$ , which is known to be involved in the negative regulation of adenylyl cyclase to mitigate cAMP signaling (Taussig *et al.*, 1993). In addition,  $G_{\alpha i 2}$ -associated  $G\beta\gamma$  subunits are capable of mediating  $\text{Ca}^{2+}$  signaling as an activator of PLC- $\beta$  (Camps *et al.*, 1992), and of changing an ion current as an activator of an inward-rectifying K-channel (Kofuji *et al.*, 1995). Since both  $\text{Ca}^{2+}$  signaling and ion channel modulation are believed to occur in taste signal transduction (Hwang *et al.*, 1990, Berhardt *et al.*, 1996, Spielman *et al.*, 1996, Ogura *et al.*, 1997), it is probable that there are some GPCR molecules that function by coupling with  $G_{\alpha i 2}$  for taste signaling. Further studies will reveal further details to explain the significance of various  $G_{\alpha}$  species, especially  $G_{\alpha i 2}$ , that exist in taste bud cells.

## Acknowledgements

We express our thanks to Dr T. Asano, Aichi Human Service Center, for providing anti- $G_{\alpha i 2}$  antibody, and to Dr K. Tanemura, University of Tokyo, for assistance with the immunostaining experiments. This study was supported in part by a grant from the Program for the Promotion of Basic Research Activities for Innovation Biosciences, Japan.

## References

- Abe, K., Kusakabe, Y., Tanemura, K., Emori, Y. and Arai, S. (1993a) Multiple genes for G protein-coupled receptors and their expression in lingual epithelia. *FEBS Lett.*, 316, 253–256.
- Abe, K., Kusakabe, Y., Tanemura, K., Emori, Y. and Arai, S. (1993b) Primary structure and cell-type specific expression of a gustatory G-protein-coupled receptor related to olfactory receptors. *J. Biol. Chem.*, 268, 12033–12039.
- Akabas, M.H., Dodd, J. and Al-Awqati, Q. (1988) A bitter substance

induces a rise in intracellular calcium in a subpopulation of rat taste cells. *Science*, 242, 1047–1050.

- Asano-Miyoshi, M., Kusakabe, Y., Abe, K. and Emori, Y. (1998) Identification of taste-tissue-specific cDNA clones from a subtraction cDNA library of rat circumvallate and foliate papillae. *J. Biochem.*, 124, 927–933.
- Avenet, P., Hofman, F. and Lindemann, B. (1988) Transduction in taste receptor cells requires cAMP-dependent protein kinase. *Nature*, 331, 351–354.
- Berhardt, S.J., Naim, M., Zehavi, U. and Lindemann, B. (1996) Changes in  $\text{IP}_3$  and cytosolic  $\text{Ca}^{2+}$  in response to sugars and non-sugar sweeteners in transduction of sweet taste in the rat. *J. Physiol.*, 490, 325–336.
- Brand, J.G., Teeter, J.H., Kumazawa, T. and Huque, T. (1991) Transduction mechanisms for the taste of amino acids. *Physiol. Behav.*, 49, 899–904.
- Camps, M., Carozzi, A., Schnabel, P., Scheer, A., Parker, P.J. and Gierschik, P. (1992) Isozyme-selective stimulation of phospholipase C- $\beta$  2 by G protein beta gamma-subunits. *Nature*, 360, 684–686.
- Delay, R.J., Kinnamon, J.C. and Roper, S.D. (1986) Ultrastructure of mouse vallate taste buds: II. Cell types and cell lineage. *J. Comp. Neurol.*, 253, 242–252.
- Dulac, C. and Axel, R. (1995) A novel family of genes encoding putative pheromone receptors in mammals. *Cell*, 83, 195–206.
- Feinstein, D.L., Mumby, S.M. and Milner, R.J. (1992) Characterization of *Gs* alpha mRNA transcripts in primary cultures of rat brain astrocytes. *Glia*, 5, 139–145.
- Hoon, M.A., Adler, E., Lindemeier, J., Battey, J.F., Ryba, N.J. and Zuker, C.S. (1999) Putative mammalian taste receptors: a class of taste-specific GPCRs with distinct topographic selectivity. *Cell*, 96, 541–551.
- Hwang, P.M., Verma, A., Brecht, D.S. and Snyder, S.H. (1990) Localization of phosphatidylinositol signaling components in rat taste cells: role in bitter taste transduction. *Proc. Natl Acad. Sci. USA*, 87, 7395–7399.
- Jones, D.T. and Reed, R.R. (1987) Molecular cloning of five GTP-binding protein cDNA species from rat olfactory neuroepithelium. *J. Biol. Chem.*, 262, 14241–14249.
- Kofuji, P., Davidson, N. and Lester, H. A. (1995) Evidence that neuronal G-protein-gated inwardly rectifying  $\text{K}^+$  channels are activated by G beta gamma subunits and function as heteromultimers. *Proc. Natl Acad. Sci. USA*, 92, 6542–6546.
- Kusakabe, Y., Yamaguchi, E., Tanemura, K., Kameyama, K., Chiba, N., Arai, S., Emori, Y. and Abe, K. (1998) Identification of two  $\alpha$ -subunit species of GTP-binding proteins,  $G_{\alpha 15}$  and  $G_{\alpha q}$ , expressed in rat taste buds. *Biochim. Biophys. Acta*, 1403, 265–272.
- Lindemann, B. (1996) Taste reception. *Physiol. Rev.*, 76, 719–766.
- Matsuoka, I., Mori, T., Aoki, J., Sato, T. and Kurihara, K. (1993) Identification of novel members of G-protein coupled receptor superfamily expressed in bovine taste tissue. *Biochem. Biophys. Res. Commun.*, 194, 504–511.
- McLaughlin, S.K., Mckinnon, P.J. and Margolskee, R.F. (1992) Gustducin is taste-cell-specific G protein closely related to the transducins. *Nature*, 357, 563–569.
- McLaughlin, S.K., Mckinnon, P.J., Spickofsky, N., Danho, W. and Margolskee, R.F. (1994) Molecular cloning of G proteins and phosphodiesterases from rat taste cells. *Physiol. Behav.*, 56, 1157–1164.

- Nudel, U., Zakut, R., Shani, M., Neuman, S., Levy, Z. and Yatte, D.** (1983) *The nucleotide sequence of the rat cytoplasmic beta-actin gene.* Nucleic Acids Res., 11, 1759–1771.
- Ogura, T., Mackay-Sim, A. and Kinnamon, S.C.** (1997) *Bitter taste transduction of denatonium in mudpuppy Necturus maculosus.* J. Neurosci., 17, 3580–3587.
- Sambrook, J., Fritsch, E.F. and Maniatis, T.** (1989) *Molecular Cloning: A Laboratory Manual*, 2nd edn. Cold Spring Harbor Laboratory Press, Cold Spring Harbor, NY.
- Schaeren-Wiemers, N. and Gerfin-Moser, A.** (1993) *A single protocol to detect transcripts of various types and expression levels in neural tissue and cultured cells: in situ hybridization using digoxigenin-labelled cRNA probes.* Histochemistry, 100, 431–440.
- Spielman, A.I., Huque, T., Whitney, G. and Brand, J.G.** (1994) *Generation of inositol phosphates in bitter taste transduction.* Physiol. Behav., 56, 1149–1155.
- Spielman, A.I., Nagai, H., Sunavala, G., Dasso, M., Breer, H., Boekhoff, I., Huque, T., Whitney, G. and Brand, J.G.** (1996) *Rapid kinetics of second messenger production in bitter taste.* Am. J. Physiol., 270, 926–931.
- Stone, L.M., Finger, T.E., Tam, P.P.L. and Tan, S.S.** (1995) *Taste receptor cells arise from local epithelium, not neurogenic ectoderm.* Proc. Natl Acad. Sci. USA, 92, 1916–1920.
- Striem, B.J., Pace, U., Zehavi, U., Nami, M. and Lancet, D.** (1989) *Sweet tastants stimulate adenylate cyclase coupled to GTP-binding protein in rat tongue membranes.* Biochem. J., 260, 121–126.
- Tal, M., Ammar, D.A., Karpuj, M., Krizhanovsky, V. and Naim, M.** (1995) *A novel putative neuropeptide receptor expressed in neural tissue, including sensory epithelia.* Biochem. Biophys Res. Commun., 209, 752–759.
- Taussig, R., Iniguez-Lluhi, J.A. and Gilman, A.G.** (1993) *Inhibition of adenylyl cyclase by Gi alpha.* Science, 261, 218–221.
- Thomas, M.B., Haines, S.L. and Akesson, R.A.** (1996) *Chemoreceptors expressed in taste, olfactory and male reproductive tissues.* Gene, 178, 1–5.
- Ueda, H., Morishita, R., Katoh-Semba, R., Kato, K. and Asano, T.** (1998) *G protein gamma subunits coimmunoprecipitated with antibodies against alpha subunits: identification of major isoforms in cultured cells by silver stain and immunoblotting with conventional transfer procedure.* J. Biochem., 124, 1033–1037.
- Wong, G.T., Gannon, K.S. and Margolskee, R.F.** (1996) *Transduction of bitter and sweet taste by gustducin.* Nature, 381, 796–800.
- Yang, H., Wanner, I.B., Roper, S.D. and Chaudhari, N.** (1999) *An optimized method for in situ hybridization with signal amplification that allows the detection of rare mRNAs.* J. Histochem. Cytochem., 47, 431–445.
- Yasuoka, A., Endo K., Asano-miyoshi, M., Abe, K. and Emori, Y.** (1999) *Two subfamilies of olfactory receptor genes in medaka fish, Oryzias latipes: genomic organization and differential expression in olfactory epithelium.* J. Biochem., 126, 866–873.

Accepted March 9, 2000
